# Supplementary material
Source: PubMed Central journal article supplement (PMC4124830)
Supplement: NIHMS606127-supplement-Supplementary_Data.pdf [file NIHMS606127-supplement-Supplementary_Data.pdf]

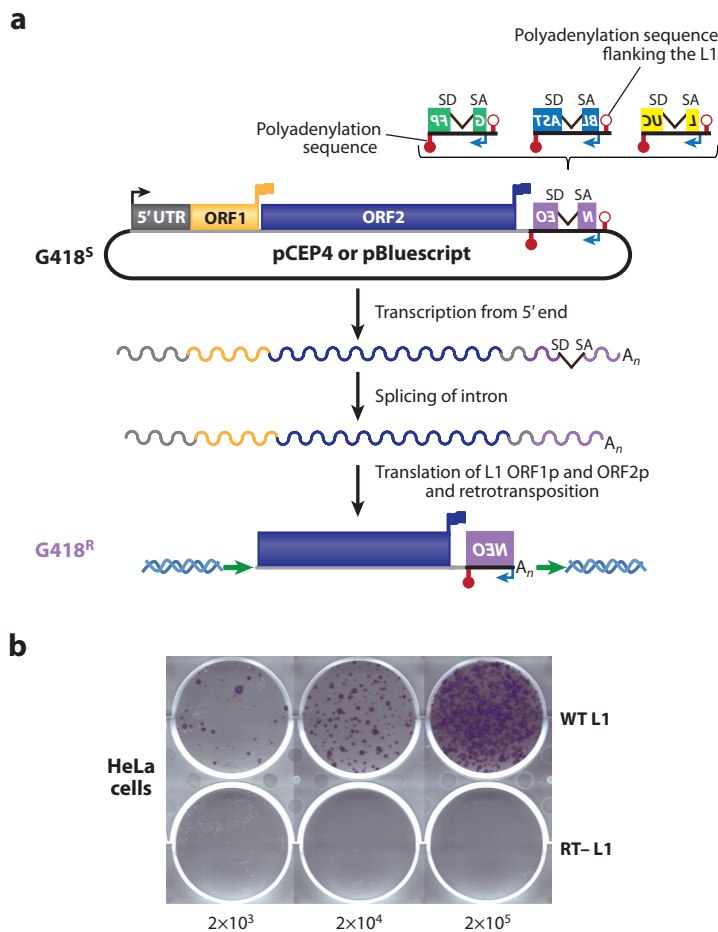

### Supplemental Figure 1

A cultured cell assay to detect LINE-1 retrotransposition: (a) Candidate active human L1s (1, 2, 7) are tagged in their 3' untranslated region (UTR) with an indicator cassette designed to detect retrotransposition events in cultured cells. The selectable/screenable markers [e.g., NEO (5, 7), GFP (9), blasticidin (8), and luciferase (12)] are in the opposite transcriptional orientation compared with the L1 and contain their own promoters (*backward blue arrow*) and polyadenylation sequences (*upside-down filled red lollipop*); they also contain an intron in the same transcriptional orientation as the L1 [splice donor (SD) and splice acceptor (SA), respectively]. This arrangement ensures that the reporter gene (e.g., *NEO*) will become activated only upon a successful round of retrotransposition (*bottom*). Flags represent epitope tags that can be placed on ORF1p and/or ORF2p (4, 6), and open lollipops represent the polyadenylation sequences flanking the L1s. Details regarding the assay can be found in Supplemental References 7 and 11. (b) Representative results of an L1 retrotransposition assay in cultured HeLa cells. WT is an active L1 allele, L1.3 [accession number L19088 (3)]. RT- is a retrotransposition-defective control containing a missense mutation (D702A) in the reverse transcriptase domain of ORF2p (10). The number of HeLa cells transfected in each experiment is depicted below the wells. The assay was performed by C.R. Beck.

## LITERATURE CITED

1. Beck CR, Collier P, Macfarlane C, Malig M, Kidd JM, et al. 2010. LINE-1 retrotransposition activity in human genomes. *Cell* 141:1159--70
2. Brouha B, Schustak J, Badge RM, Lutz-Prigge S, Farley AH, et al. 2003. Hot L1s account for the bulk of retrotransposition in the human population. *Proc. Natl. Acad. Sci. USA* 100:5280--85
3. Dombroski BA, Scott AF, Kazazian HH Jr. 1993. Two additional potential retrotransposons isolated from a human L1 subfamily that contains an active retrotransposable element. *Proc. Natl. Acad. Sci. USA* 90:6513--17
4. Doucet AJ, Hulme AE, Sahinovic E, Kulpa DA, Moldovan JB, et al. 2010. Characterization of LINE-1 ribonucleoprotein particles. *PLoS Genet.* 6:e1001150
5. Freeman JD, Goodchild NL, Mager DL. 1994. A modified indicator gene for selection of retrotransposition events in mammalian cells. *Biotechniques* 17:46, 48--49, 52
6. Kulpa DA, Moran JV. 2005. Ribonucleoprotein particle formation is necessary but not sufficient for LINE-1 retrotransposition. *Hum. Mol. Genet.* 14:3237--48
7. Moran JV, Holmes SE, Naas TP, DeBerardinis RJ, Boeke JD, Kazazian HH Jr. 1996. High frequency retrotransposition in cultured mammalian cells. *Cell* 87:917--27
8. Morrish TA, Gilbert N, Myers JS, Vincent BJ, Stamato TD, et al. 2002. DNA repair mediated by endonuclease-independent LINE-1 retrotransposition. *Nat. Genet.* 31:159--65
9. Ostertag EM, Prak ET, DeBerardinis RJ, Moran JV, Kazazian HH Jr. 2000. Determination of L1 retrotransposition kinetics in cultured cells. *Nucleic Acids Res.* 28:1418--23
10. Wei W, Gilbert N, Ooi SL, Lawler JF, Ostertag EM, et al. 2001. Human L1 retrotransposition: cis preference versus trans complementation. *Mol. Cell. Biol.* 21:1429--39
11. Wei W, Morrish TA, Alisch RS, Moran JV. 2000. A transient assay reveals that cultured human cells can accommodate multiple LINE-1 retrotransposition events. *Anal. Biochem.* 284:435--38
12. Xie Y, Rosser JM, Thompson TL, Boeke JD, An W. 2011. Characterization of L1 retrotransposition with high-throughput dual-luciferase assays. *Nucleic Acids Res.* 39:e16
